# Supplementary material
Source: PubMed Central journal article supplement (PMC6124348)
Supplement: mmc1.pdf [file mmc1.pdf]

## Supplementary Material 1

Dates for Edwards' University lectures, as published in the *Cambridge University Reporter*.

### KEY

Periods during which Edwards was called on to teach.

Periods identified as teaching obligations for Edwards

**1968–69** None

**1969–70** None

**1970–71** MWF at 9.00 4-23 Nov 1b Medical & Natural Sciences Tripos (M&NST)  
(with CR Austin: CRA)

+ Lent term (Mid January to mid March) Part 2 Physiology (Part 2) W at 5.00 (+CRA)

**1971–72** MWF at 9.00 3-22 Nov 1b M&NST + Lent term Part 2 W at 9.00 (both +CRA)

**1972–73** MWF at 9.00 23 Oct-10 Nov 1b M&NST + Lent term Pt2 W at 9.00 (both  
+CRA)

**1973–74** MWF at 9.00 29 Oct-16 Nov 1b M&NST (**RGE only**) + Lent term Pt2 W at  
9.00 (+CRA)

**1974–75** MWF at 9.00 28 Oct-15 Nov 1b M&NST (**RGE only**)

**1975–76** MWF at 9.00 27 Oct-14 Nov 1b M&NST (**RGE only**) + Lent term Pt 2 W at  
9.00 starting 21 Jan (+Dennis New)

**1976–77** 21, 26, 28 Oct and 1 Nov 1b MVST (**RGE only**) + Pt 2 on 22 and 25 Oct (**RGE  
only**) + Lent term Pt 2 Th at 9.00, 8 lectures beginning 13 Jan (+CRA)

**1977–78** Lent term Part 2 Th at 9.00, 8 lectures beginning 19 Jan (+CRA)

NOTE: Bunny Austin was a committed supporter of Edwards' IVF work and it seems like likely that he would have supported adjustments to his academic obligations so the work on IVF could proceed.
