# Supplementary material
Source: PubMed Central journal article supplement (PMC6124348)
Supplement: mmc2.pdf [file mmc2.pdf]

4550

### Hormone Regime

Pregnyl 1000 is 26/6/76, 28/6/76, 30/6/76  
2/7/76, 4/7/76, 6/7/76, ~~8/7/76~~  
5000 8/7 10/7

Samps Pergonal } 16/6/76  
Samps Pergonal } 18/6/76  
Samps Pergonal } 20/6/76  
5000 is Pregnyl 23/6/76 03.30

Progesterone 25mg 27/6/76, 28/7/76, 2/7/76 4/7  
50mg 5/7/76, 6/7/76, ~~7/7/76~~  
25mg 7/7, 8/7, 9/7, 10/7

Indecid 25mg x 5 doses 28/6/76  
Mometak 500mg 9/7

4pm 25/6/76 Transferred into small dish of paraffin in F10 + HS Probably pronucleate

10pm 2-c

10-0 am 26/6 8-c heavy   
10-0 pm 27/6 16-32c absolute beauty  
1-6 am 28/6 Super-beauty  
8-0 am 29/6 Early heavy 

TT v. nice  
8.10 am 0.05 ml

11/11/52

Hormone Regime

Pregnyl 1000 i.u. 25/6/36, 27/6/36  
29/6/36, 1/7/36, 3/7/36  
5/7/36, ~~7/7/36~~, ~~9/7/36~~  
500 i.u. 7/7, 9/7

|           |          |         |   |
|-----------|----------|---------|---|
| Samps     | Pergonal | 14/6/36 | 4 |
| Samps     | Pergonal | 16/6/36 | 6 |
| Samps     | Pergonal | 18/6/36 | 8 |
| 5000 i.u. | Pregnyl  | 22/6/36 |   |

lutocid 25mg x 4 doses 27/6/36  
Progesterone 25mg 3/7/36, 4/7/36  
50mg 5/7/36 and every day 6/7  
25mg 7/7, 8/7, 9/7, 10/7

From invoice, sucie 12/7. Momet 250 mg

24/6/36

11.45 am 1 drop F10 HS added to tube

1 egg C- PB

1 x 2-c rather nice 2 group of cells attached

} put under paraffin 2 pm → F10 156 HS

9-0 pm 24/6 V nice 2-c

4 pm 25/6/36 v. nice 4-8-c

10 am 26/6 8-c v. nice

11-0 pm 27/6 Maxilla put → Skupez

1-0 pm 28/6 Each blood

(50) 2 results

T 2.05

TJ

Skull v. 0.05 ml

H324

### Hormone Regime

3x5amps Pergonal 13/6, 15/6, 17/6

5000iu Pregnyl 20/6 06:30

7:30am 21/6 Efn → No 10/6/13 products.  
8:45am Complete media + see PR

5:00pm 22/6 1u was clean. 2-c?

2pm 23/6/76 { 1x ? 2-4-c large cell + 2 smaller ones 2 salvage cells overlapping  
1x unscr. in thick cells. ?? 4-c

1:45pm 24/6/76 { 1x 3-c  
1x 8-c approx v. nice even blastomeres - some cells attached so can't see it all

3:20pm 25/6/76 { 1x 16-c  
1x 2-c

10:0am 26/6 32c efb

18:00am v. nice 0.05ul

Pregnyl 1000iu 23/6, 25/6, 27/6, 29/6, 1/7, 2/7, 4/7, 6/7, ~~8/7~~  
500iu 8/7, 10/7

Indocid 25mg 9pm 12am 25/6  
6am 9am 12m-2 26/6

Progesterone 25mg 30/6  
50mg 2/7, 4/7, 5/7, 6/7, ~~7/7, 8/7~~  
25mg 7/7 8/7 9/7 10/7

3 H534  
5 7 9 10

Hormone Regime: 5x Samps Pergonal 9/6/36, 11/6/36, 13/6/36, 15/6/36, 16/6/36  
 5000io Pregnyl 18/6/36 03:30  
 8-02a 20/6. No <sup>15-4c</sup> blast. HS (Kellin) added progesterone  
 10-02a Complete. a) 1 egg + 2PN + cells b) 1 egg + 2PN + cells c) 1 egg + 2PN? diff  
 14-30p 20/6a) Not a lot 2-c - uneven blast. some incomplete cleave  
 b) 2-c vacuole  
 c) 2-c cells, mainly male diff.  
 9-02a 21/6. V. nice 4-c at least in b + from? c. a is heavy  
 but unevenly  
 10-30p 21/6. fc a+b+c. a: general cells  
 8-02a 22/6. V. nice cleave cells, uneven. a: ball 1/cell

2pm 23/6 3x1-c  
 1 stripy  
 1 32 cell blast } b+c

a = v. nice 32c perhaps few less. large cells at the pole. but might be → stripy? blasto

12-30 24/6 2x group of cells → secretory cells about to → blasto.

12-30 <sup>24/6</sup> T: attempted to T both. Only one evidently entered when other found in cannula (lunar) after transfer 0-05hr. Tret' at second time 0-05hr still in inner cannula. Tret third time 0-07hr still in cannula. Patient put back to rest

10-30pm <sup>24/6</sup> T again. This embryo now a beautiful blasto in 2p,  filling up nicely. T number 0-04hr.

3-45pm 25/6 remaining embryo transferred into small dish in Buhner's F10 - little ball of cells looks like early blasto or stripy

Progesterone 25mg 22/6/36, 23/6/36  
 Indocid 25mg x 2 doses 23/6/36  
 x 4 doses 24/6/36  
 Pregnyl 10000io 21/6/36, 23/6/36, 25/6/36  
 27/6/36, 29/6/36, 1/7/36, 2/7/36  
 4/7/36 6/7/36 8/7/36

10-02a 26/6 Ball of cells → blasto  
 10-07- 27/6 Still ball of cells

Primidol depot 500mg 28/6/36, 2/7/36, 9/7  
 25mg progesterone 10m n 11th
